# Supplementary material for: Effects of chronic treatment with new strains of Lactobacillus plantarum on cognitive, anxiety- and depressive-like behaviors in male mice
Source: PubMed Central journal article supplement (PMC7304620; doi:10.1371/journal.pone.0234037), 2020-06-19
Supplement: pone.0234037.s002.pdf [file pone.0234037.s002.pdf]

Supplementary material for the article "Effects of chronic treatment with new strains of *Lactobacillus plantarum* on cognitive, anxiety- and depressive-like behaviors in male mice"

**Experiment 2: Effects of treatment with Lp 286 and Lp 81 strains on anxiety-like behavior, learning and memory in male mice**

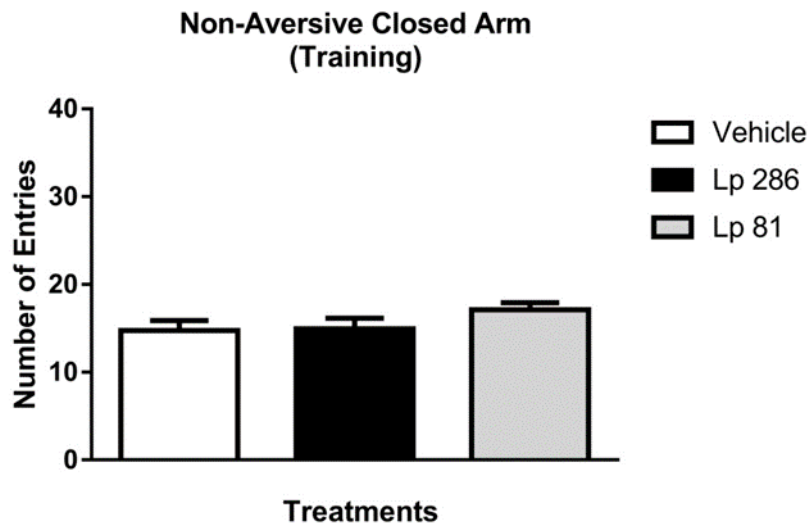

**S2 Figure. Number of entries into the non-aversive closed arm of the apparatus during the *training* session of the plus maze - discriminative avoidance test. ANOVA: [F(2,45)=1.543; p=0.2249].**
